# Supplementary material
Source: PubMed Central journal article supplement (PMC6867931)

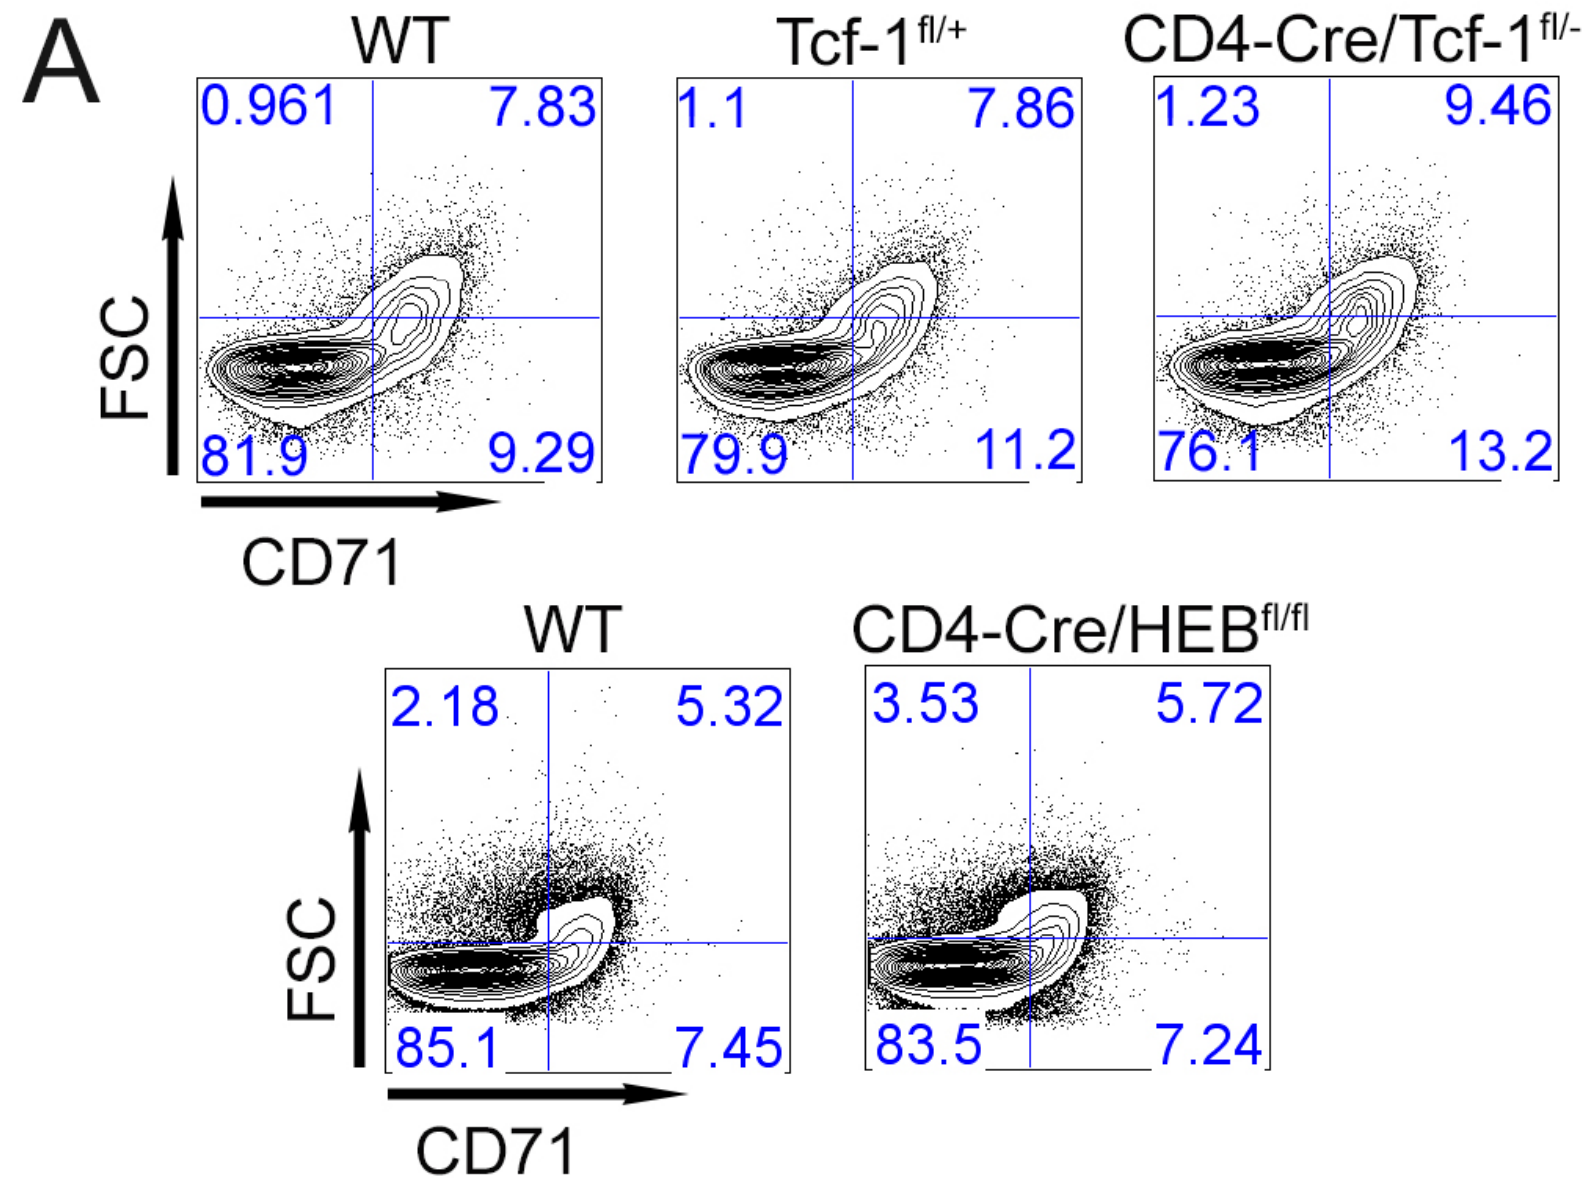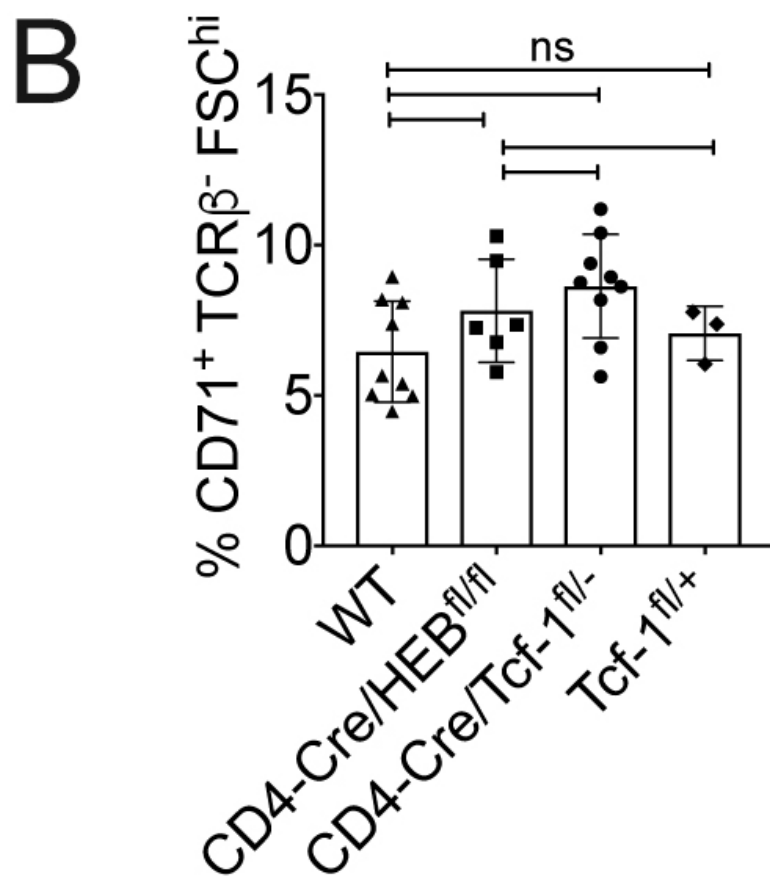

Supplement: NIHMS1056019-supplement-31948_1_supp_374526_pd2d0d.pdf [file NIHMS1056019-supplement-31948_1_supp_374526_pd2d0d.pdf]

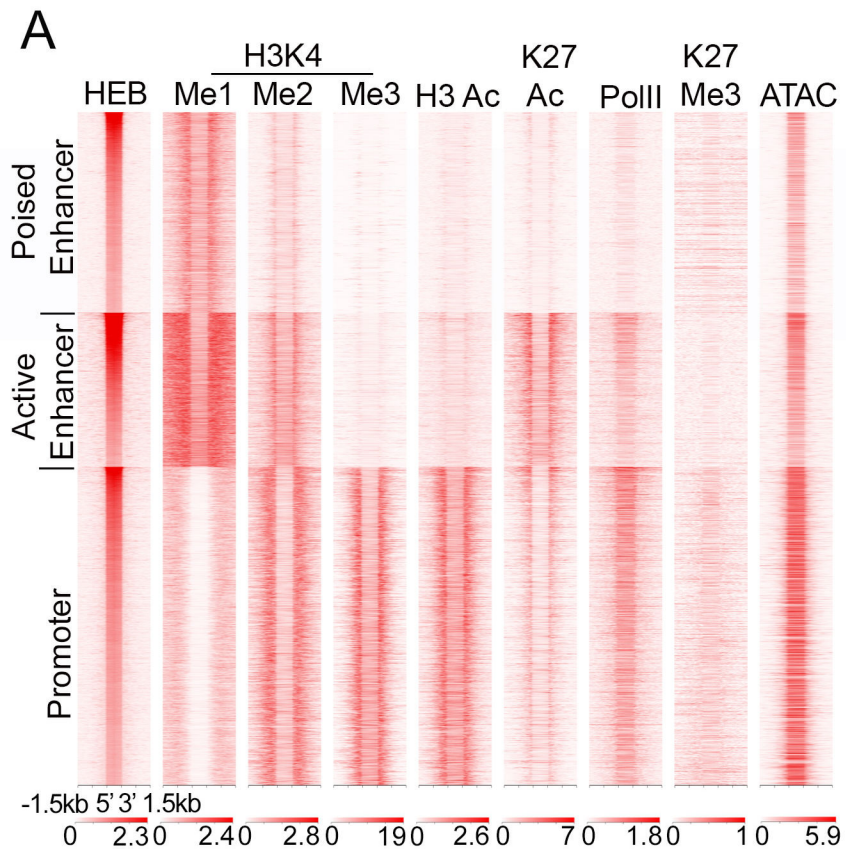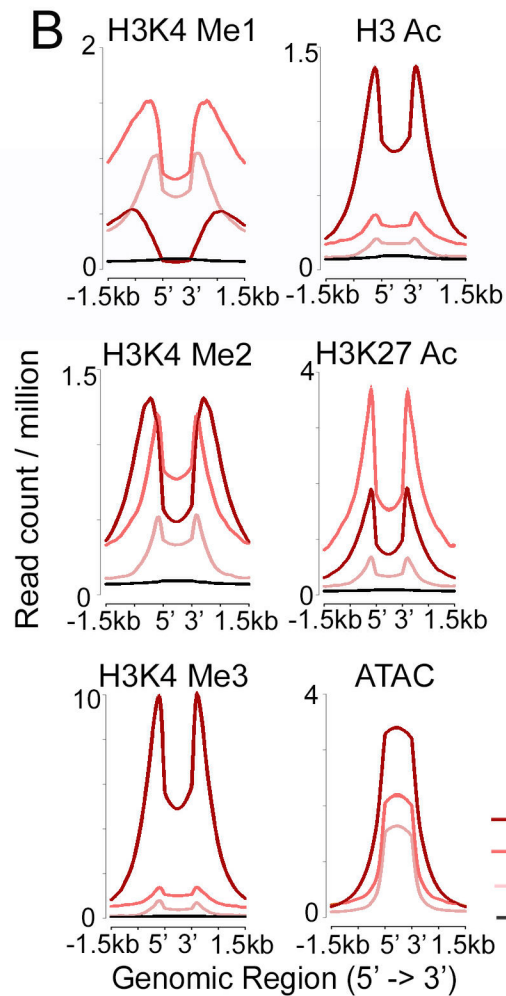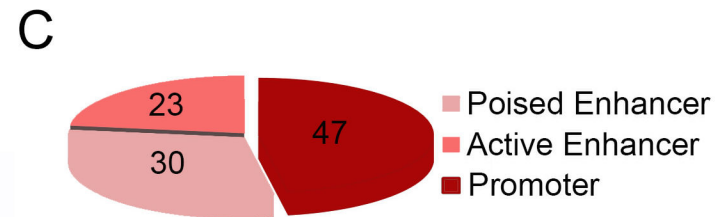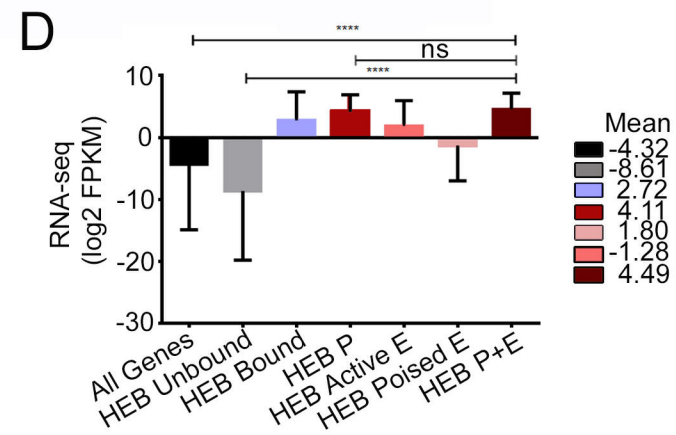

— Promoter

— Active Enhancer

— Poised Enhancer

— Input

Supplement: NIHMS1056019-supplement-31948_1_supp_374527_pd2202.pdf [file NIHMS1056019-supplement-31948_1_supp_374527_pd2202.pdf]

A

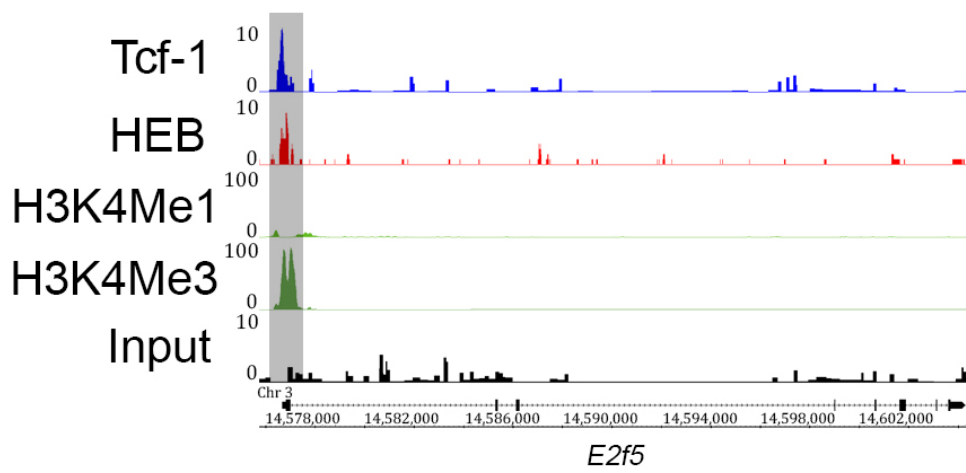

B

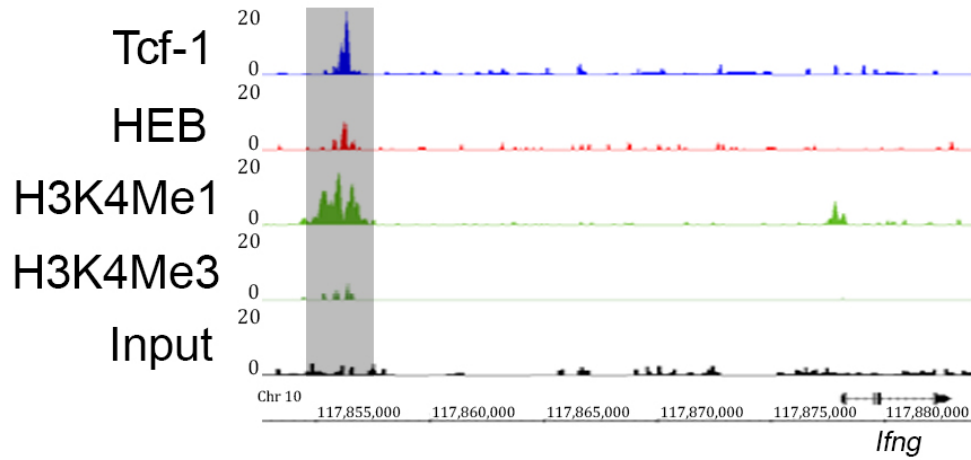

C

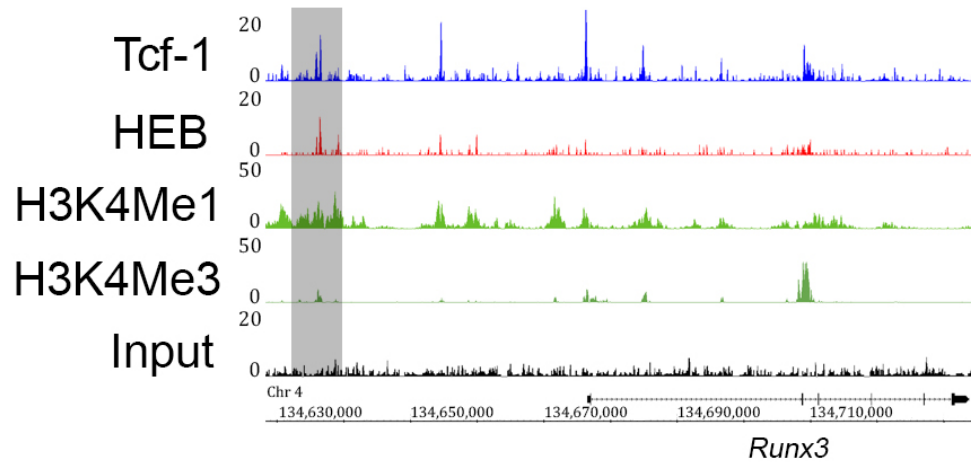

D

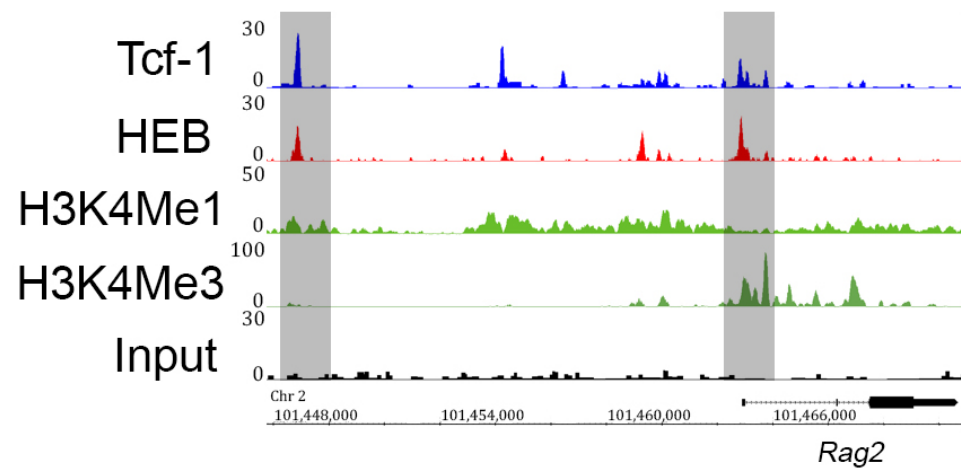

Supplement: NIHMS1056019-supplement-31948_1_supp_374528_pd2v0v.pdf [file NIHMS1056019-supplement-31948_1_supp_374528_pd2v0v.pdf]

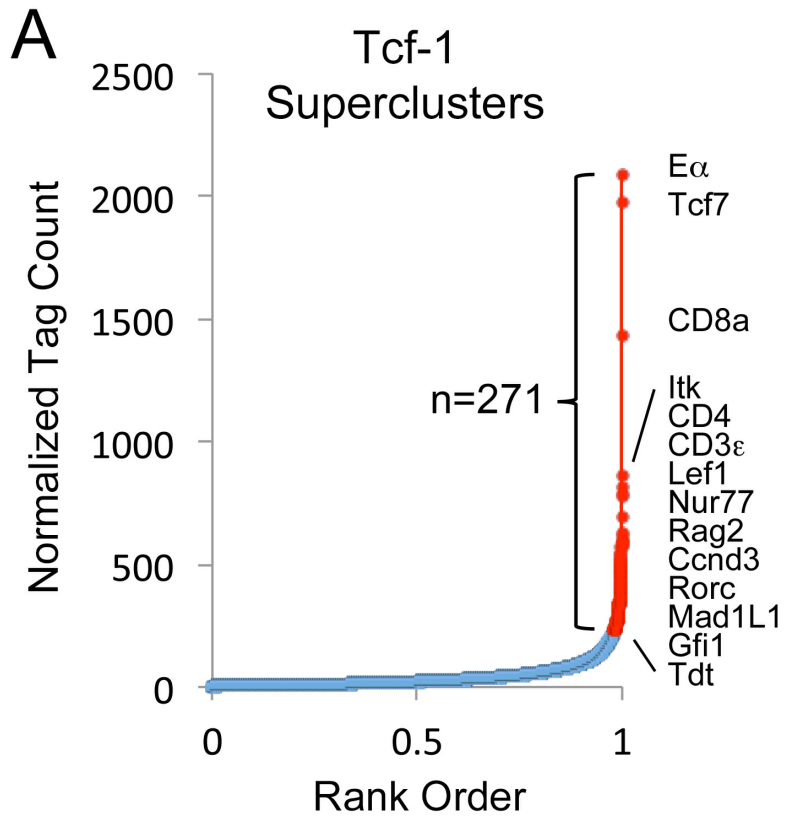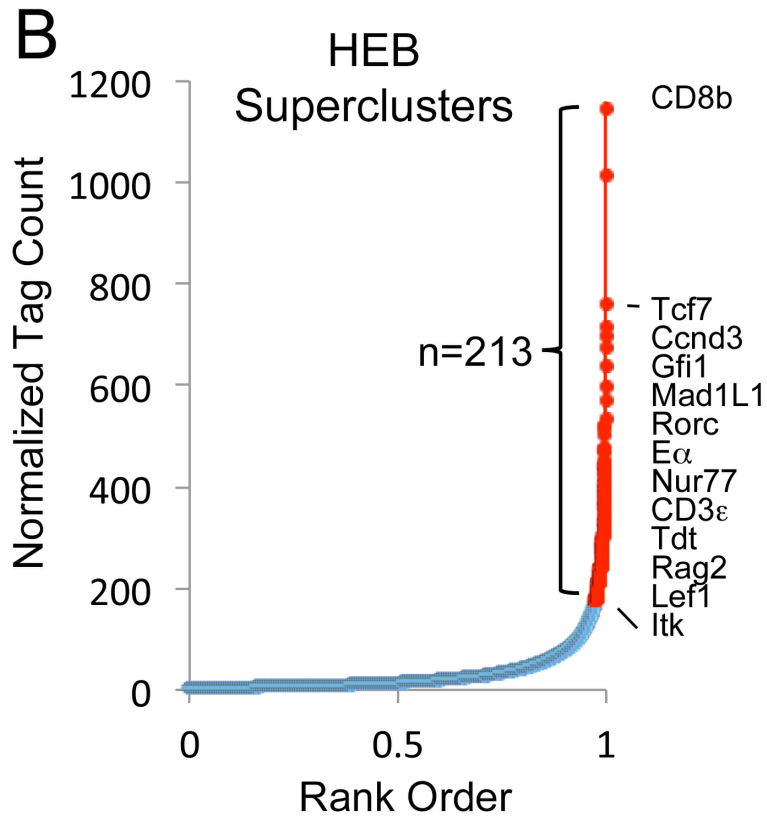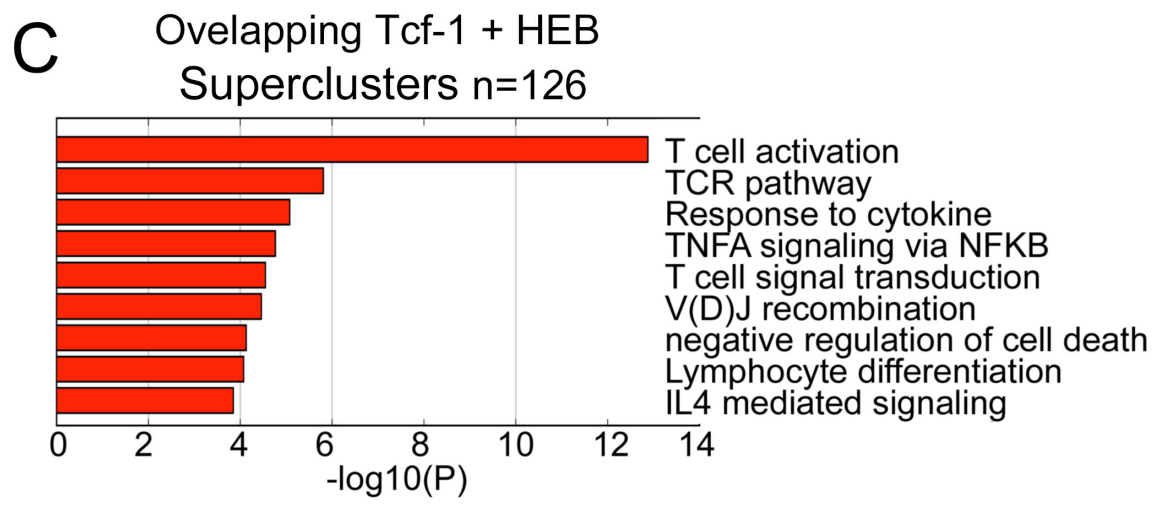

Supplement: NIHMS1056019-supplement-31948_1_supp_374529_pd2n0n.pdf [file NIHMS1056019-supplement-31948_1_supp_374529_pd2n0n.pdf]

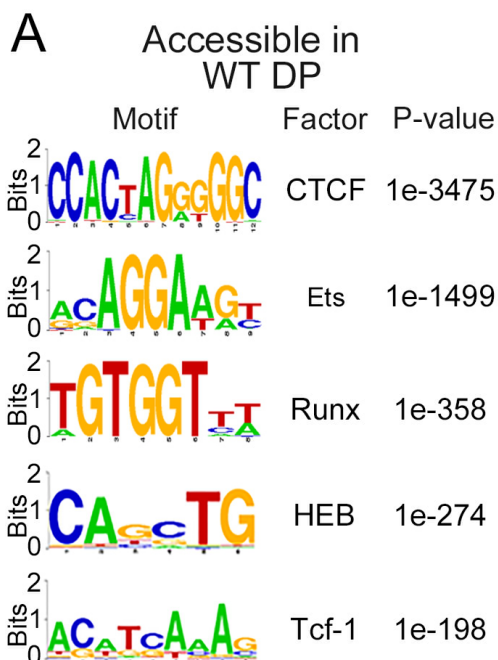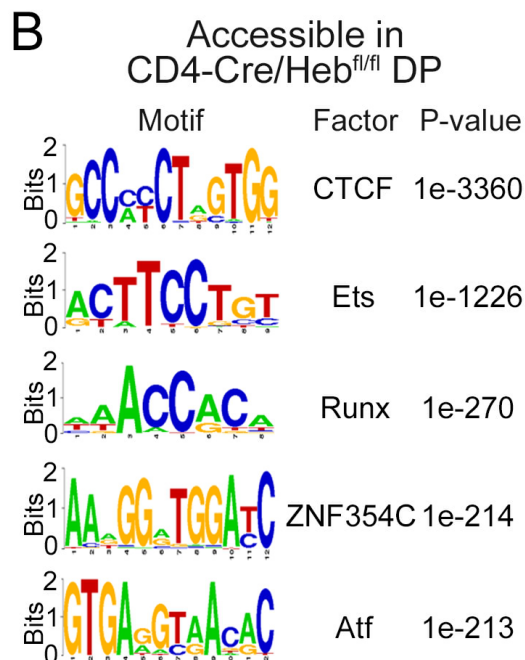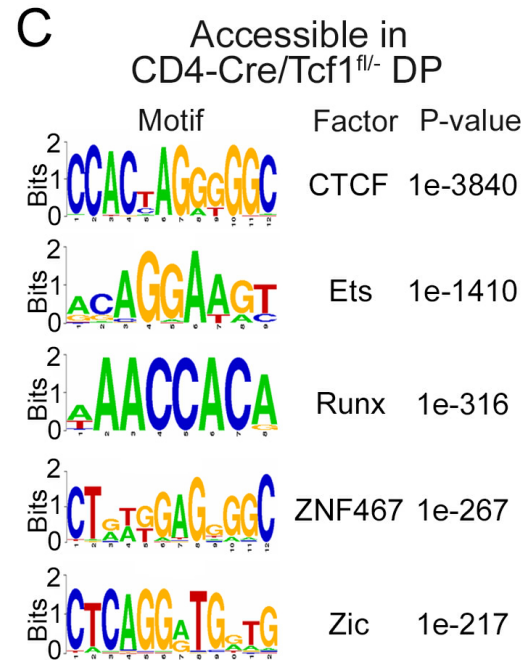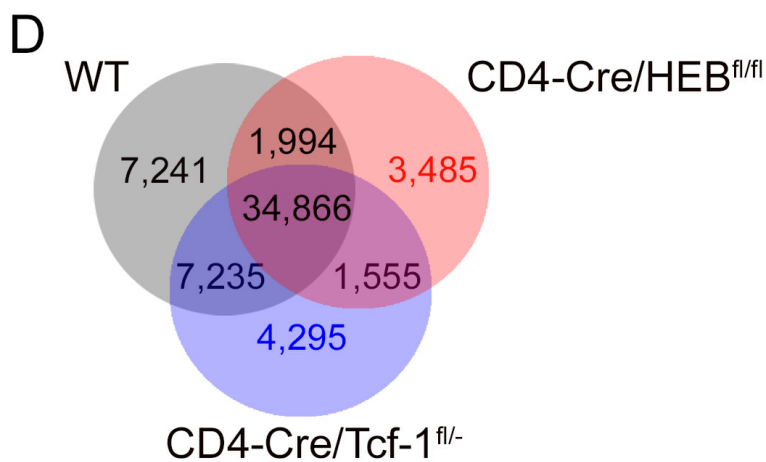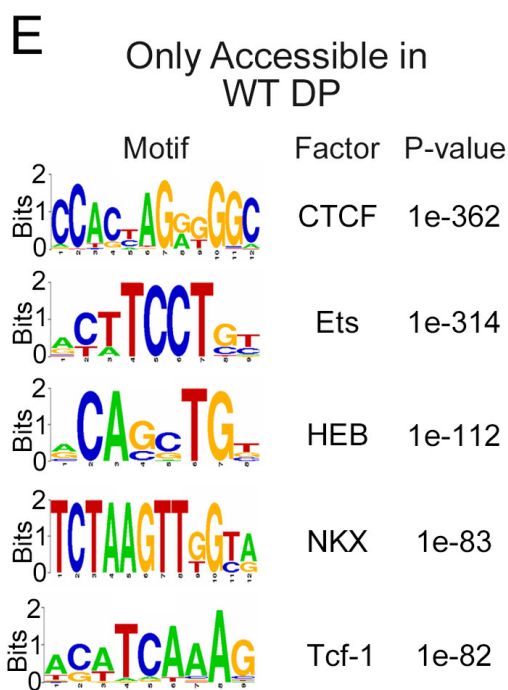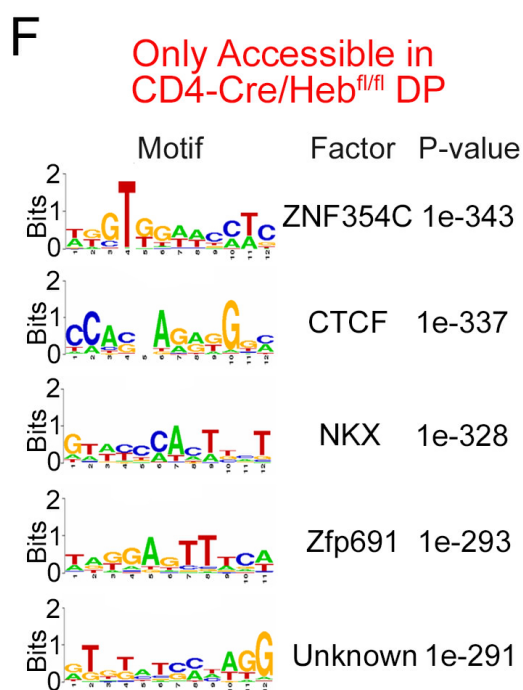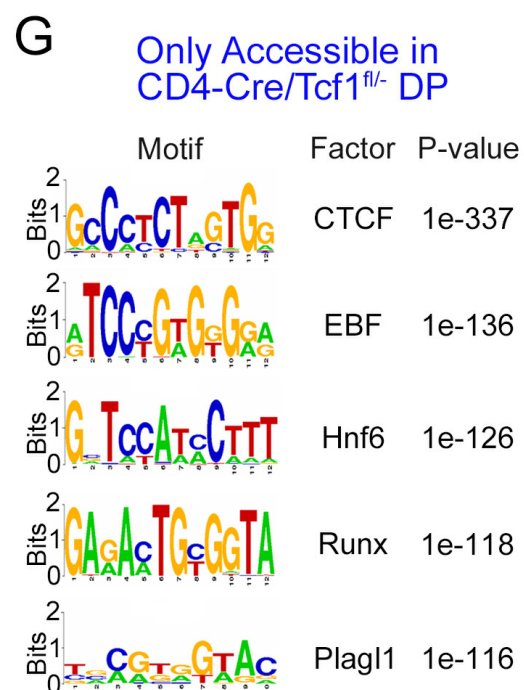

Supplement: NIHMS1056019-supplement-31948_1_supp_374530_pd2p0p.pdf [file NIHMS1056019-supplement-31948_1_supp_374530_pd2p0p.pdf]

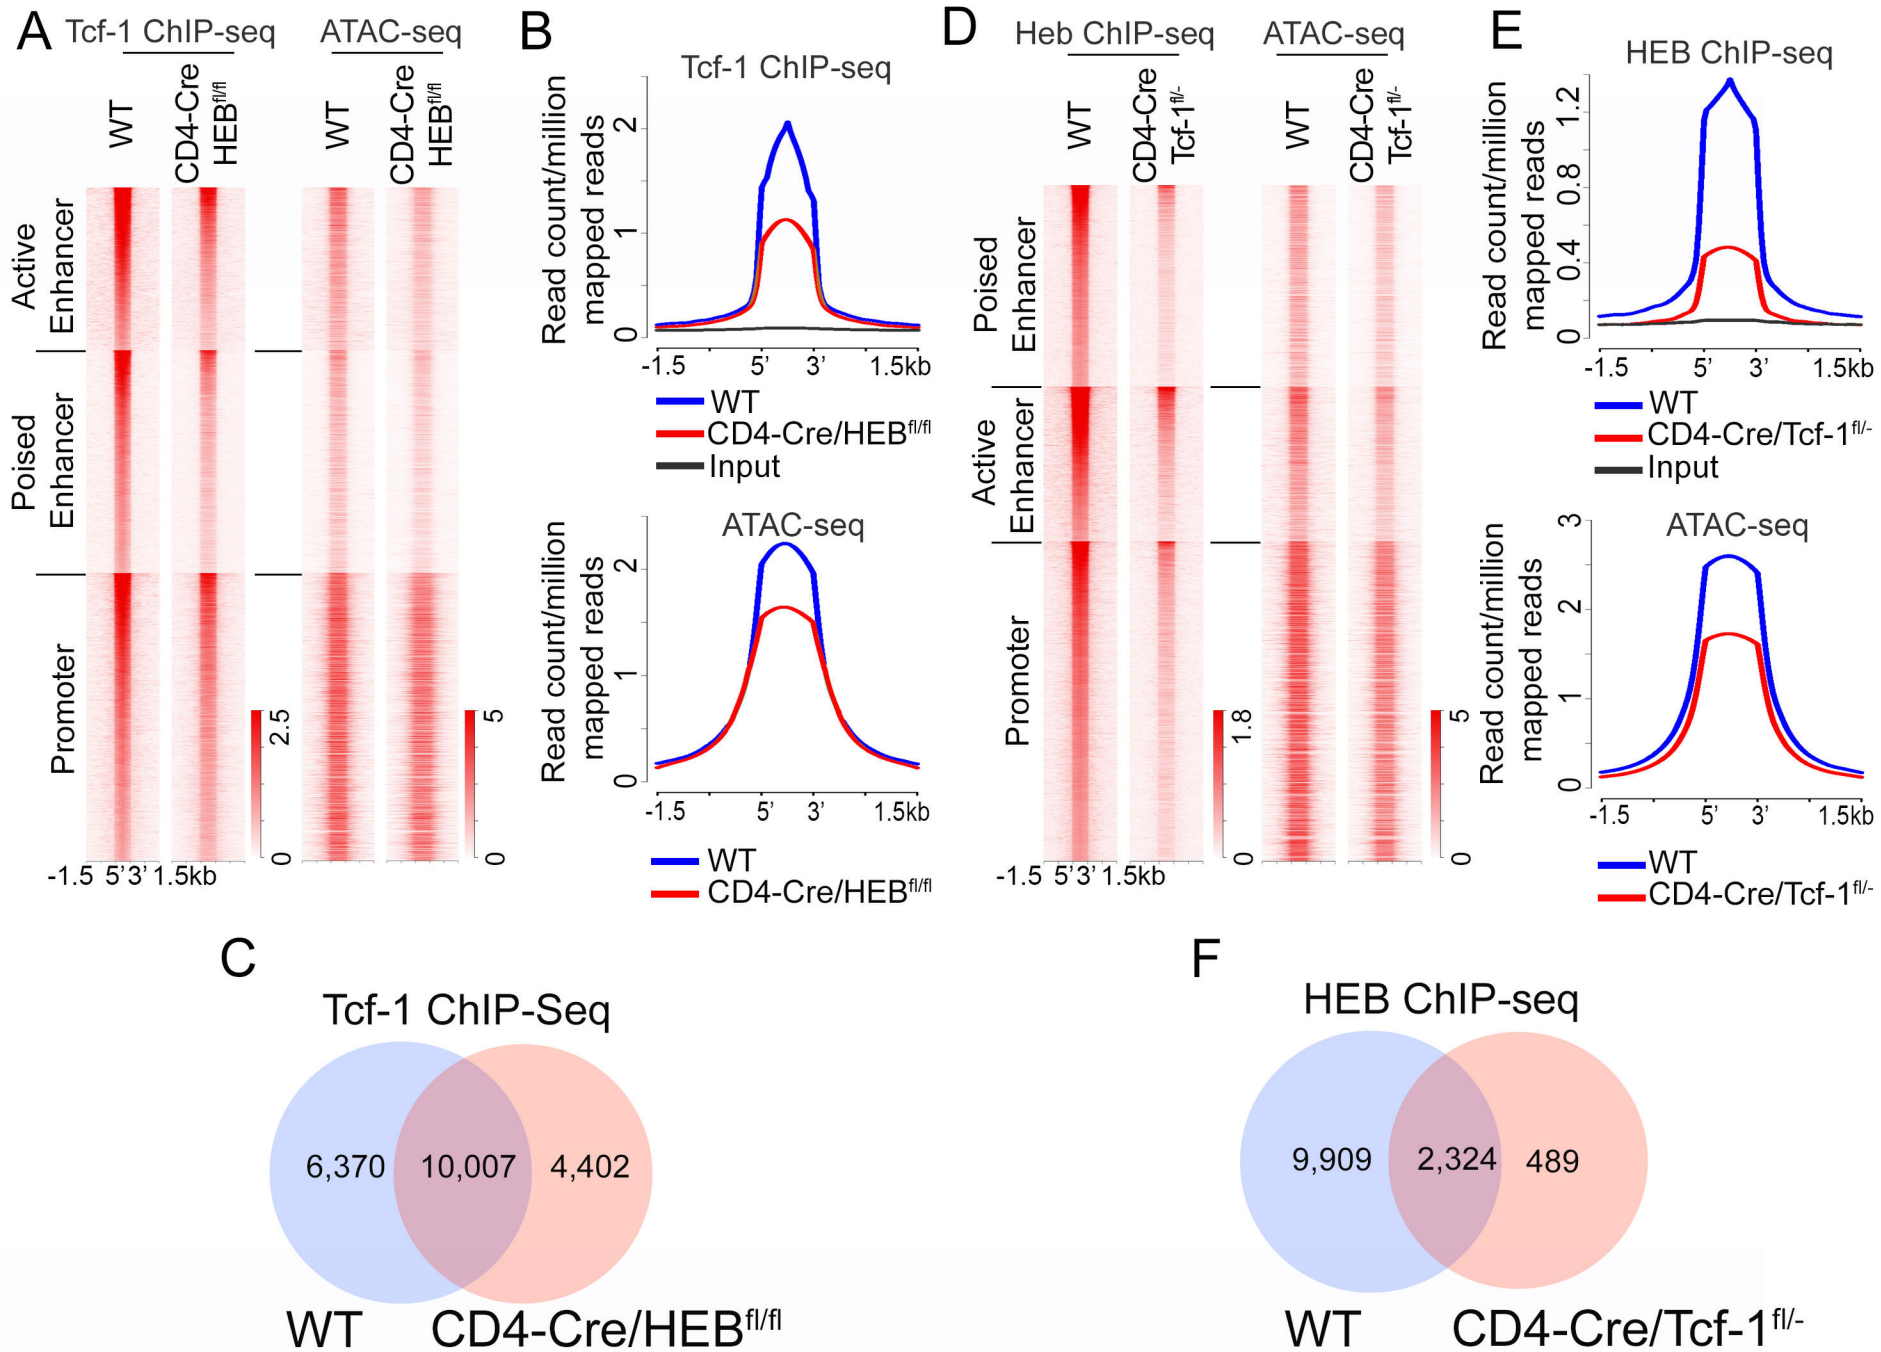

Supplement: NIHMS1056019-supplement-31948_1_supp_374531_pd2m0m.pdf [file NIHMS1056019-supplement-31948_1_supp_374531_pd2m0m.pdf]

**A** Tcf-1 and HEB ChIP-seq in WT Thymocytes

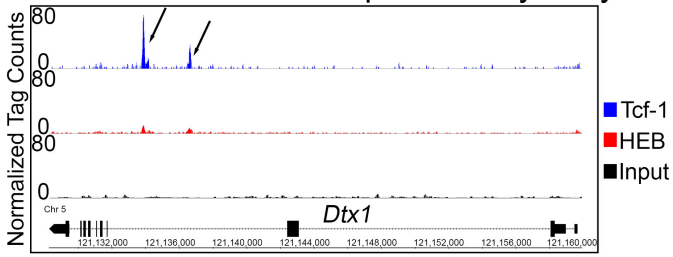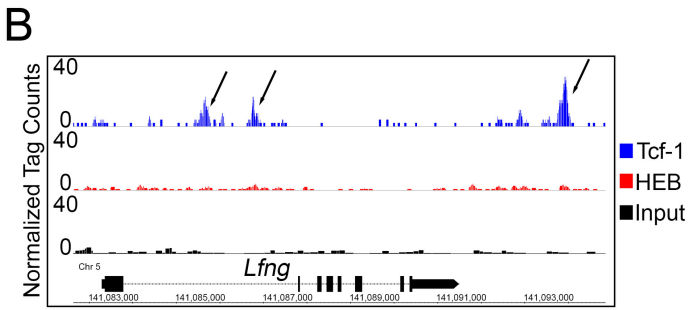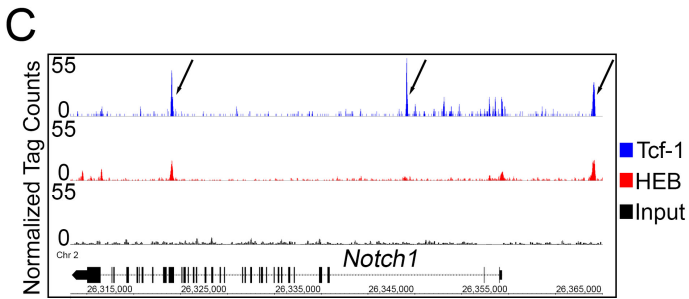

**D**

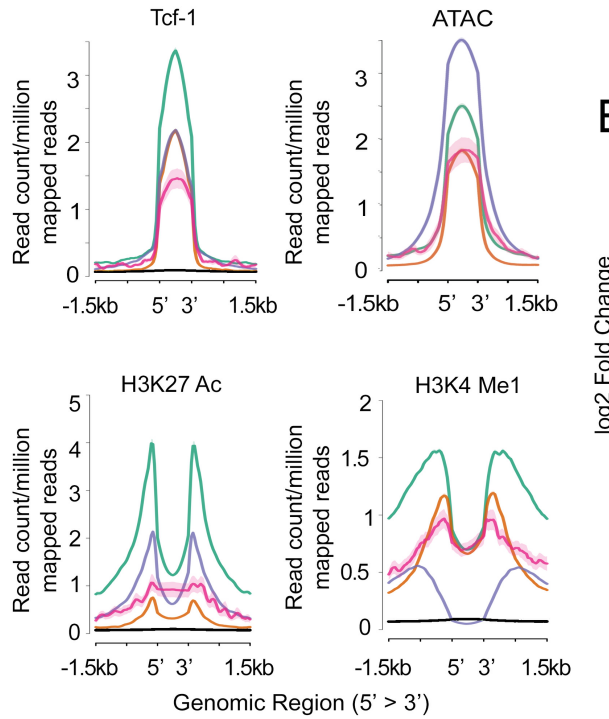

**E**

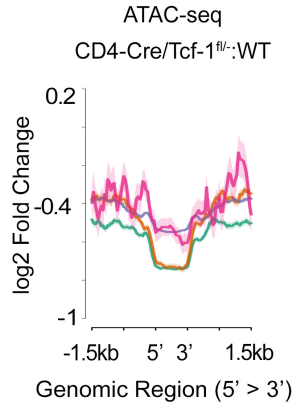

Supplement: NIHMS1056019-supplement-31948_1_supp_374532_pd2t0t.pdf [file NIHMS1056019-supplement-31948_1_supp_374532_pd2t0t.pdf]
